# Supplementary material for: Variant detection and runs of homozygosity in next generation sequencing data elucidate the genetic background of Lundehund syndrome
Source: BMC Genomics. 2016 Aug 2;17:535. doi: 10.1186/s12864-016-2844-6 (PMC4971756; doi:10.1186/s12864-016-2844-6)
Supplement: Additional file 6: — Private runs of homozygosity for LS-unaffected Lundehund in 500-SNP windows. The chromosomal position of ROH regions, number of SNPs in these regions (n), size in base pairs (size_bp), canine genes (gene) and human orthologues (human gene) are shown. (XLSX 65 kb) [file 12864_2016_2844_MOESM6_ESM.xlsx]

## Sheet: NonPLE500_ROH_Positionen_erw
Additional file 6. Private runs of homozygosity for LS-unaffected Lundehund in 500-SNP windows. The chromosomal position of ROH regions, number of SNPs in these regions (n), size in base pairs (size_bp), canine genes (gene) and human orthologues (human gene) are shown.
chrom	pos1	pos2	n	size_bp	genes	human_gene	description
1	6963978	7033527	121	69550
1	7185516	7334197	490	148682
1	10148062	10148062	1	1
1	12409771	12412734	47	2964
1	13401183	13593484	667	192302	ENSCAFT00000000084,ENSCAFT00000000107,ENSCAFT00000000087,ENSCAFT00000000088,ENSCAFT00000049263,ENSCAFT00000038011	SERPINB11,SERPINB3,SERPINB4,SERPINB13,SERPINB12,SERPINB12,SERPINB5	serpin peptidase inhibitor, clade B (ovalbumin), member 11 (gene/pseudogene) [Source:HGNC Symbol;Acc:HGNC:14221],serpin peptidase inhibitor, clade B (ovalbumin), member 3 [Source:HGNC Symbol;Acc:HGNC:10569],serpin peptidase inhibitor, clade B (ovalbumin), member 4 [Source:HGNC Symbol;Acc:HGNC:10570],serpin peptidase inhibitor, clade B (ovalbumin), member 13 [Source:HGNC Symbol;Acc:HGNC:8944],serp…
1	17257301	17257560	10	260
2	7559438	7952435	1379	392998	ENSCAFT00000006882,ENSCAFT00000035079	MYO3A,N/A,RNA5SP284,RNA5SP283,5S_RRNA,RNA5SP519,5S_RRNA,RNA5SP174	myosin IIIA [Source:HGNC Symbol;Acc:HGNC:7601],N/A,RNA, 5S ribosomal pseudogene 284 [Source:HGNC Symbol;Acc:HGNC:43184],RNA, 5S ribosomal pseudogene 283 [Source:HGNC Symbol;Acc:HGNC:43183],5S ribosomal RNA [Source:RFAM;Acc:RF00001],RNA, 5S ribosomal pseudogene 519 [Source:HGNC Symbol;Acc:HGNC:43419],5S ribosomal RNA [Source:RFAM;Acc:RF00001],RNA, 5S ribosomal pseudogene 174 [Source:HGNC Symbol;Ac…
2	9997401	9997401	1	1
2	10195539	10209650	38	14112	ENSCAFT00000006755	ARMC3	armadillo repeat containing 3 [Source:HGNC Symbol;Acc:HGNC:30964]
2	15998676	16192519	557	193844	ENSCAFT00000050150,ENSCAFT00000006428,ENSCAFT00000034465	SVIL,SVIL,RNU6-433P	supervillin [Source:HGNC Symbol;Acc:HGNC:11480],supervillin [Source:HGNC Symbol;Acc:HGNC:11480],RNA, U6 small nuclear 433, pseudogene [Source:HGNC Symbol;Acc:HGNC:47396]
2	17146565	17270675	428	124111
4	1738562	1786267	178	47706	ENSCAFT00000015878	N/A	N/A
4	6332776	6883646	1883	550871	ENSCAFT00000046236,ENSCAFT00000018397,ENSCAFT00000018358,ENSCAFT00000046477,ENSCAFT00000018422,ENSCAFT00000034205,ENSCAFT00000018427	MLK4,PCNXL2,MLK4,MLK4,NTPCR,N/A,N/A	Mitogen-activated protein kinase kinase kinase MLK4 [Source:UniProtKB/Swiss-Prot;Acc:Q5TCX8],pecanex-like 2 (Drosophila) [Source:HGNC Symbol;Acc:HGNC:8736],Mitogen-activated protein kinase kinase kinase MLK4 [Source:UniProtKB/Swiss-Prot;Acc:Q5TCX8],Mitogen-activated protein kinase kinase kinase MLK4 [Source:UniProtKB/Swiss-Prot;Acc:Q5TCX8],nucleoside-triphosphatase, cancer-related [Source:HGNC Sy…
4	6883672	7287621	1071	403950	ENSCAFT00000049173,ENSCAFT00000018573	SIPA1L2,SIPA1L2	signal-induced proliferation-associated 1 like 2 [Source:HGNC Symbol;Acc:HGNC:23800],signal-induced proliferation-associated 1 like 2 [Source:HGNC Symbol;Acc:HGNC:23800]
5	10059638	10121701	408	62064
5	14638269	14638273	2	5	ENSCAFT00000019218	CBL	Cbl proto-oncogene, E3 ubiquitin protein ligase [Source:HGNC Symbol;Acc:HGNC:1541]
5	19747078	19747244	19	167	ENSCAFT00000022040	DRD2	dopamine receptor D2 [Source:HGNC Symbol;Acc:HGNC:3023]
5	24317038	24317525	6	488	ENSCAFT00000045287	NPAT	nuclear protein, ataxia-telangiectasia locus [Source:HGNC Symbol;Acc:HGNC:7896]
5	24375954	24375971	5	18	ENSCAFT00000047270,ENSCAFT00000023145	ACAT1,ACAT1	acetyl-CoA acetyltransferase 1 [Source:HGNC Symbol;Acc:HGNC:93],acetyl-CoA acetyltransferase 1 [Source:HGNC Symbol;Acc:HGNC:93]
5	24923954	24986047	295	62094	ENSCAFT00000023372	CWF19L2	CWF19-like 2, cell cycle control (S. pombe) [Source:HGNC Symbol;Acc:HGNC:26508]
5	25708105	25710999	30	2895	ENSCAFT00000023426	GUCY1A2	guanylate cyclase 1, soluble, alpha 2 [Source:HGNC Symbol;Acc:HGNC:4684]
5	26068267	26068553	22	287
5	27005523	27005722	17	200
5	28044831	28046086	24	1256	ENSCAFT00000045078	PDGFD	platelet derived growth factor D [Source:HGNC Symbol;Acc:HGNC:30620]
5	28556580	28701598	503	145019	ENSCAFT00000023808,ENSCAFT00000043082	DYNC2H1,DYNC2H1	dynein, cytoplasmic 2, heavy chain 1 [Source:HGNC Symbol;Acc:HGNC:2962],dynein, cytoplasmic 2, heavy chain 1 [Source:HGNC Symbol;Acc:HGNC:2962]
5	28980613	28980694	12	82	ENSCAFT00000045860,ENSCAFT00000023900	MMP1,MMP1	matrix metallopeptidase 1 [Source:HGNC Symbol;Acc:HGNC:7155],matrix metallopeptidase 1 [Source:HGNC Symbol;Acc:HGNC:7155]
5	35868790	36103273	784	234484	ENSCAFT00000028231,ENSCAFT00000028307,ENSCAFT00000028314	DNAH9,ZNF18,N/A	dynein, axonemal, heavy chain 9 [Source:HGNC Symbol;Acc:HGNC:2953],zinc finger protein 18 [Source:HGNC Symbol;Acc:HGNC:12969],N/A
5	37710878	37710929	5	52
5	37848065	37848088	3	24
5	38311518	38311528	4	11
5	41075164	41237401	710	162238	ENSCAFT00000028971,ENSCAFT00000008668,ENSCAFT00000028986,ENSCAFT00000028988,ENSCAFT00000028996	SLC5A10,FAM83G,FAM83G,PRPSAP2,SHMT1	solute carrier family 5 (sodium/sugar cotransporter), member 10 [Source:HGNC Symbol;Acc:HGNC:23155],family with sequence similarity 83, member G [Source:HGNC Symbol;Acc:HGNC:32554],family with sequence similarity 83, member G [Source:HGNC Symbol;Acc:HGNC:32554],phosphoribosyl pyrophosphate synthetase-associated protein 2 [Source:HGNC Symbol;Acc:HGNC:9467],serine hydroxymethyltransferase 1 (solubl…
5	44285448	44395600	360	110153
5	48880808	48947851	248	67044
5	67258515	67472735	724	214221	ENSCAFT00000031714	FAM92B	family with sequence similarity 92, member B [Source:HGNC Symbol;Acc:HGNC:24781]
5	67552818	67553151	29	334
6	9304819	9455944	655	151126	ENSCAFT00000023031,ENSCAFT00000049366,ENSCAFT00000023065,ENSCAFT00000040306,ENSCAFT00000044587,ENSCAFT00000023088,ENSCAFT00000023104,ENSCAFT00000047914,ENSCAFT00000023119,ENSCAFT00000023121,ENSCAFT00000044984,ENSCAFT00000045198,ENSCAFT00000046073,ENSCAFT00000023122	PVRIG,STAG3,STAG3,N/A,GPC2,GPC2,GAL3ST4,C7ORF43,LAMTOR4,N/A,N/A,STAG3L5P-PVRIG2P-PILRB,PILRA,PILRB,PILRB,STAG3L5P-PVRIG2P-PILRB,PILRA,STAG3L5P-PVRIG2P-PILRB,PILRA,PILRB	poliovirus receptor related immunoglobulin domain containing [Source:HGNC Symbol;Acc:HGNC:32190],stromal antigen 3 [Source:HGNC Symbol;Acc:HGNC:11356],stromal antigen 3 [Source:HGNC Symbol;Acc:HGNC:11356],N/A,glypican 2 [Source:HGNC Symbol;Acc:HGNC:4450],glypican 2 [Source:HGNC Symbol;Acc:HGNC:4450],galactose-3-O-sulfotransferase 4 [Source:HGNC Symbol;Acc:HGNC:24145],chromosome 7 open reading fra…
6	9965348	10122686	777	157339	ENSCAFT00000050123,ENSCAFT00000049229,ENSCAFT00000043310,ENSCAFT00000023781,ENSCAFT00000023824,ENSCAFT00000048508,ENSCAFT00000048135,ENSCAFT00000044858,ENSCAFT00000047428	N/A,ZNF655,FAM200A,ZKSCAN5,ZNF394,ZNF789,ZNF789,N/A,N/A	N/A,zinc finger protein 655 [Source:HGNC Symbol;Acc:HGNC:30899],family with sequence similarity 200, member A [Source:HGNC Symbol;Acc:HGNC:25401],zinc finger with KRAB and SCAN domains 5 [Source:HGNC Symbol;Acc:HGNC:12867],zinc finger protein 394 [Source:HGNC Symbol;Acc:HGNC:18832],zinc finger protein 789 [Source:HGNC Symbol;Acc:HGNC:27801],zinc finger protein 789 [Source:HGNC Symbol;Acc:HGNC:278…
6	10665701	10857622	742	191922	ENSCAFT00000024339	NPTX2	neuronal pentraxin II [Source:HGNC Symbol;Acc:HGNC:7953]
6	12464361	13082400	1644	618040	ENSCAFT00000025425,ENSCAFT00000047576,ENSCAFT00000025446,ENSCAFT00000042942,ENSCAFT00000043697,ENSCAFT00000025470,ENSCAFT00000025509,ENSCAFT00000049917,ENSCAFT00000035749,ENSCAFT00000049225,ENSCAFT00000025536,ENSCAFT00000025553,ENSCAFT00000044839,ENSCAFT00000025556	FBXL18,TNRC18,TNRC18,TNRC18,N/A,SLC29A4,WIPI2,WIPI2,RADIL,RADIL,RADIL,AP5Z1,FOXK1,FOXK1	F-box and leucine-rich repeat protein 18 [Source:HGNC Symbol;Acc:HGNC:21874],trinucleotide repeat containing 18 [Source:HGNC Symbol;Acc:HGNC:11962],trinucleotide repeat containing 18 [Source:HGNC Symbol;Acc:HGNC:11962],trinucleotide repeat containing 18 [Source:HGNC Symbol;Acc:HGNC:11962],N/A,solute carrier family 29 (equilibrative nucleoside transporter), member 4 [Source:HGNC Symbol;Acc:HGNC:23…
6	13552533	13552673	6	141	ENSCAFT00000025755	SDK1	sidekick cell adhesion molecule 1 [Source:HGNC Symbol;Acc:HGNC:19307]
6	15424951	15598935	589	173985	ENSCAFT00000026145,ENSCAFT00000026189,ENSCAFT00000002246,ENSCAFT00000050104	MAFK,INTS1,SPECC1L-ADORA2A,SPECC1L-ADORA2A	v-maf avian musculoaponeurotic fibrosarcoma oncogene homolog K [Source:HGNC Symbol;Acc:HGNC:6782],integrator complex subunit 1 [Source:HGNC Symbol;Acc:HGNC:24555],SPECC1L-ADORA2A readthrough (NMD candidate) [Source:HGNC Symbol;Acc:HGNC:49185],SPECC1L-ADORA2A readthrough (NMD candidate) [Source:HGNC Symbol;Acc:HGNC:49185]
6	19986066	20010567	129	24502
6	21121521	21121521	1	1
6	21318810	21377396	182	58587	ENSCAFT00000045503,ENSCAFT00000027808	TNRC6A,TNRC6A	trinucleotide repeat containing 6A [Source:HGNC Symbol;Acc:HGNC:11969],trinucleotide repeat containing 6A [Source:HGNC Symbol;Acc:HGNC:11969]
6	22009007	22088361	156	79355	ENSCAFT00000027949	PRKCB	protein kinase C, beta [Source:HGNC Symbol;Acc:HGNC:9395]
6	27317026	27317026	1	1
6	29886954	30271335	1102	384382	ENSCAFT00000029902,ENSCAFT00000043085,ENSCAFT00000040890,ENSCAFT00000047642,ENSCAFT00000029910	SHISA9,N/A,N/A,CPPED1,N/A	shisa family member 9 [Source:HGNC Symbol;Acc:HGNC:37231],N/A,N/A,calcineurin-like phosphoesterase domain containing 1 [Source:HGNC Symbol;Acc:HGNC:25632],N/A
6	30614168	30614168	1	1
6	30882103	30882214	6	112
6	32642589	32642649	14	61	ENSCAFT00000030136	GRIN2A	glutamate receptor, ionotropic, N-methyl D-aspartate 2A [Source:HGNC Symbol;Acc:HGNC:4585]
6	34625737	35083297	1742	457561
6	35484562	35484566	2	5
6	46090812	46091816	26	1005
6	47262662	47356382	373	93721
6	47940844	47941253	10	410
6	48163863	48163941	13	79
6	48825121	48825141	3	21
7	8337490	8358420	68	20931
7	9446563	9446724	8	162	ENSCAFT00000019172,ENSCAFT00000019169,ENSCAFT00000049703,ENSCAFT00000045505	KCNH1,KCNH1,KCNH1,KCNH1	potassium channel, voltage gated eag related subfamily H, member 1 [Source:HGNC Symbol;Acc:HGNC:6250],potassium channel, voltage gated eag related subfamily H, member 1 [Source:HGNC Symbol;Acc:HGNC:6250],potassium channel, voltage gated eag related subfamily H, member 1 [Source:HGNC Symbol;Acc:HGNC:6250],potassium channel, voltage gated eag related subfamily H, member 1 [Source:HGNC Symbol;Acc:HG…
7	10316251	10758536	1556	442286	ENSCAFT00000019428,ENSCAFT00000019500,ENSCAFT00000019526,ENSCAFT00000019561,ENSCAFT00000019576,ENSCAFT00000019579	INTS7,DTL,RPL32,PPP2R5A,TMEM206,NENF	integrator complex subunit 7 [Source:HGNC Symbol;Acc:HGNC:24484],denticleless E3 ubiquitin protein ligase homolog (Drosophila) [Source:HGNC Symbol;Acc:HGNC:30288],ribosomal protein L32 [Source:HGNC Symbol;Acc:HGNC:10336],protein phosphatase 2, regulatory subunit B', alpha [Source:HGNC Symbol;Acc:HGNC:9309],transmembrane protein 206 [Source:HGNC Symbol;Acc:HGNC:25593],neudesin neurotrophic factor …
7	12784002	12837671	190	53670
7	15626486	15626636	5	151
7	18018791	18391002	1097	372212	ENSCAFT00000048252,ENSCAFT00000021393,ENSCAFT00000043859,ENSCAFT00000041470,ENSCAFT00000021407,ENSCAFT00000021461,ENSCAFT00000050159,ENSCAFT00000021480	FAM129A,FAM129A,N/A,RNU6-270P,RNF2,TRMT1L,SWT1,SWT1	family with sequence similarity 129, member A [Source:HGNC Symbol;Acc:HGNC:16784],family with sequence similarity 129, member A [Source:HGNC Symbol;Acc:HGNC:16784],N/A,RNA, U6 small nuclear 270, pseudogene [Source:HGNC Symbol;Acc:HGNC:47233],ring finger protein 2 [Source:HGNC Symbol;Acc:HGNC:10061],tRNA methyltransferase 1 homolog (S. cerevisiae)-like [Source:HGNC Symbol;Acc:HGNC:16782],SWT1 RNA …
7	19330044	19330077	10	34
7	20076457	21557893	3407	1481437	ENSCAFT00000021917,ENSCAFT00000045170,ENSCAFT00000021922,ENSCAFT00000021935,ENSCAFT00000021951,ENSCAFT00000021952,ENSCAFT00000022005,ENSCAFT00000022001,ENSCAFT00000022053,ENSCAFT00000022081,ENSCAFT00000022090,ENSCAFT00000022098,ENSCAFT00000022211,ENSCAFT00000022220,ENSCAFT00000041244,ENSCAFT00000037891,ENSCAFT00000022314,ENSCAFT00000041088	CFH,CFH,FAM163A,TDRD5,NPHS2,N/A,AXDND1,AXDND1,SOAT1,ABL2,TOR3A,FAM20B,RALGPS2,ANGPTL1,N/A,TEX35,RASAL2,N/A	complement factor H [Source:HGNC Symbol;Acc:HGNC:4883],complement factor H [Source:HGNC Symbol;Acc:HGNC:4883],family with sequence similarity 163, member A [Source:HGNC Symbol;Acc:HGNC:28274],tudor domain containing 5 [Source:HGNC Symbol;Acc:HGNC:20614],nephrosis 2, idiopathic, steroid-resistant (podocin) [Source:HGNC Symbol;Acc:HGNC:13394],N/A,axonemal dynein light chain domain containing 1 [Sou…
7	21817395	22183036	1269	365642
7	22661265	23668788	2434	1007524	ENSCAFT00000022524,ENSCAFT00000048122,ENSCAFT00000022611,ENSCAFT00000032775,ENSCAFT00000022628,ENSCAFT00000022640,ENSCAFT00000036742,ENSCAFT00000033123,ENSCAFT00000022674,ENSCAFT00000022676,ENSCAFT00000042380,ENSCAFT00000022688	ASTN1,PAPPA2,PAPPA2,N/A,N/A,N/A,N/A,RNU1-138P,RFWD2,ENY2,SCARNA3,N/A	astrotactin 1 [Source:HGNC Symbol;Acc:HGNC:773],pappalysin 2 [Source:HGNC Symbol;Acc:HGNC:14615],pappalysin 2 [Source:HGNC Symbol;Acc:HGNC:14615],N/A,N/A,N/A,N/A,RNA, U1 small nuclear 138, pseudogene [Source:HGNC Symbol;Acc:HGNC:48480],ring finger and WD repeat domain 2, E3 ubiquitin protein ligase [Source:HGNC Symbol;Acc:HGNC:17440],enhancer of yellow 2 homolog (Drosophila) [Source:HGNC Symbol;A…
7	24278974	25691489	3160	1412516	ENSCAFT00000049954,ENSCAFT00000022816,ENSCAFT00000022824,ENSCAFT00000048584,ENSCAFT00000032248,ENSCAFT00000044707,ENSCAFT00000042467,ENSCAFT00000022901,ENSCAFT00000043868,ENSCAFT00000042849,ENSCAFT00000041526,ENSCAFT00000022951,ENSCAFT00000023017,ENSCAFT00000023042,ENSCAFT00000040398,ENSCAFT00000040886,ENSCAFT00000040492,ENSCAFT00000040256,ENSCAFT00000040650,ENSCAFT00000040530,ENSCAFT00000040668,…	TNN,TNN,MRPS14,CACYBP,RABGAP1L,N/A,AC000354.1,RABGAP1L,RNU6-831P,RNU6-33P,N/A,RC3H1,SERPINC1,ZBTB37,N/A,SNORD75,SNORD75,N/A,SNORD77,SNORD44,SNORD78,SNORD78,SNORD79,N/A,N/A,SNORD81,DARS2,CENPL,KLHL20,ANKRD45,N/A,SLC9C2,SLC9C2,SLC9C2,PRDX6	tenascin N [Source:HGNC Symbol;Acc:HGNC:22942],tenascin N [Source:HGNC Symbol;Acc:HGNC:22942],mitochondrial ribosomal protein S14 [Source:HGNC Symbol;Acc:HGNC:14049],calcyclin binding protein [Source:HGNC Symbol;Acc:HGNC:30423],RAB GTPase activating protein 1-like [Source:HGNC Symbol;Acc:HGNC:24663],N/A,N/A,RAB GTPase activating protein 1-like [Source:HGNC Symbol;Acc:HGNC:24663],RNA, U6 small nuc…
7	25972667	26026069	227	53403	ENSCAFT00000023154	TNFSF18	tumor necrosis factor (ligand) superfamily, member 18 [Source:HGNC Symbol;Acc:HGNC:11932]
7	26282387	26804005	1365	521619	ENSCAFT00000023306,ENSCAFT00000023323,ENSCAFT00000042176,ENSCAFT00000037925,ENSCAFT00000023332,ENSCAFT00000023335,ENSCAFT00000023557,ENSCAFT00000023561	FASLG,SUCO,RNU6-859P,C1ORF105,C1ORF105,PIGC,DNM3,DNM3	Fas ligand (TNF superfamily, member 6) [Source:HGNC Symbol;Acc:HGNC:11936],SUN domain containing ossification factor [Source:HGNC Symbol;Acc:HGNC:1240],RNA, U6 small nuclear 859, pseudogene [Source:HGNC Symbol;Acc:HGNC:47822],chromosome 1 open reading frame 105 [Source:HGNC Symbol;Acc:HGNC:29591],chromosome 1 open reading frame 105 [Source:HGNC Symbol;Acc:HGNC:29591],phosphatidylinositol glycan a…
7	27177418	27241255	424	63838
8	6575546	6575998	15	453
8	9085567	9085937	13	371	ENSCAFT00000019949,ENSCAFT00000043635	PRKD1,PRKD1	protein kinase D1 [Source:HGNC Symbol;Acc:HGNC:9407],protein kinase D1 [Source:HGNC Symbol;Acc:HGNC:9407]
8	9378701	9380115	18	1415
8	17575551	17798152	720	222602
8	18235609	18235737	11	129
9	14673272	15056911	1282	383640	ENSCAFT00000048731,ENSCAFT00000017738,ENSCAFT00000017672,ENSCAFT00000017663,ENSCAFT00000017643,ENSCAFT00000017623	RGS9,RGS9,GNA13,AMZ2,SLC16A6,ARSG	regulator of G-protein signaling 9 [Source:HGNC Symbol;Acc:HGNC:10004],regulator of G-protein signaling 9 [Source:HGNC Symbol;Acc:HGNC:10004],guanine nucleotide binding protein (G protein), alpha 13 [Source:HGNC Symbol;Acc:HGNC:4381],archaelysin family metallopeptidase 2 [Source:HGNC Symbol;Acc:HGNC:28041],solute carrier family 16, member 6 [Source:HGNC Symbol;Acc:HGNC:10927],arylsulfatase G [Sou…
9	15519728	15574953	300	55226	ENSCAFT00000017398,ENSCAFT00000049015,ENSCAFT00000017448	ABCA9,ABCA9,N/A	ATP-binding cassette, sub-family A (ABC1), member 9 [Source:HGNC Symbol;Acc:HGNC:39],ATP-binding cassette, sub-family A (ABC1), member 9 [Source:HGNC Symbol;Acc:HGNC:39],N/A
9	28167588	28467436	961	299849	ENSCAFT00000046657,ENSCAFT00000033406	N/A,RNU6-746P	N/A,RNA, U6 small nuclear 746, pseudogene [Source:HGNC Symbol;Acc:HGNC:47709]
9	28839273	28841032	6	1760
9	29413089	29413138	3	50
9	29609197	29635719	158	26523
9	30719988	30853388	1002	133401	ENSCAFT00000049438,ENSCAFT00000027513	PCTP,PCTP	phosphatidylcholine transfer protein [Source:HGNC Symbol;Acc:HGNC:8752],phosphatidylcholine transfer protein [Source:HGNC Symbol;Acc:HGNC:8752]
9	31278057	37455192	13673	6177136	ENSCAFT00000048709,ENSCAFT00000048811,ENSCAFT00000027522,ENSCAFT00000047287,ENSCAFT00000047386,ENSCAFT00000027545,ENSCAFT00000027553,ENSCAFT00000027568,ENSCAFT00000027582,ENSCAFT00000047887,ENSCAFT00000047897,ENSCAFT00000027593,ENSCAFT00000044319,ENSCAFT00000027605,ENSCAFT00000027607,ENSCAFT00000044518,ENSCAFT00000027609,ENSCAFT00000027616,ENSCAFT00000050080,ENSCAFT00000027630,ENSCAFT00000040973,…	ANKFN1,ANKFN1,ANKFN1,NOG,C17ORF67,DGKE,TRIM25,COIL,SCPEP1,SCPEP1,AKAP1,AKAP1,N/A,CCDC182,MRPS23,CUEDC1,CUEDC1,VEZF1,VEZF1,SRSF1,N/A,DYNLL2,OR4D1,MKS1,LPO,MPO,MPO,BZRAP1,MIR142,SUPT4H1,RNF43,RNF43,HSF5,HSF5,HSF5,MTMR4,MTMR4,SEPT4,SEPT4,TEX14,TEX14,TEX14,N/A,U3,U3,U3,U3,U3,U3,U3,U3,U3,U3,U3,U3,U3,U3,U3,U3,U3,U3,U3,U3,U3,U3,U3,U3,U3,U3,N/A,N/A,N/A,N/A,RAD51C,PPM1E,N/A,TRIM37,TRIM37,SKA2,MIR454,MIR30…	ankyrin-repeat and fibronectin type III domain containing 1 [Source:HGNC Symbol;Acc:HGNC:26766],ankyrin-repeat and fibronectin type III domain containing 1 [Source:HGNC Symbol;Acc:HGNC:26766],ankyrin-repeat and fibronectin type III domain containing 1 [Source:HGNC Symbol;Acc:HGNC:26766],noggin [Source:HGNC Symbol;Acc:HGNC:7866],chromosome 17 open reading frame 67 [Source:HGNC Symbol;Acc:HGNC:2790…
9	37754380	37775888	100	21509	ENSCAFT00000048342	CCL15-CCL14,CCL15,CCL23	CCL15-CCL14 readthrough (NMD candidate) [Source:HGNC Symbol;Acc:HGNC:44436],chemokine (C-C motif) ligand 15 [Source:HGNC Symbol;Acc:HGNC:10613],chemokine (C-C motif) ligand 23 [Source:HGNC Symbol;Acc:HGNC:10622]
9	39042217	39071406	154	29190
9	40276497	40808065	1183	531569	ENSCAFT00000029185,ENSCAFT00000029189,ENSCAFT00000048749,ENSCAFT00000042049,ENSCAFT00000029207,ENSCAFT00000029244,ENSCAFT00000029238,ENSCAFT00000034980,ENSCAFT00000029249,ENSCAFT00000046491,ENSCAFT00000029252,ENSCAFT00000043009,ENSCAFT00000029309,ENSCAFT00000047688,ENSCAFT00000029317	MYO1D,CDK5R1,N/A,N/A,PSMD11,ZNF207,ZNF207,MIR632,C17ORF75,RHBDL3,RHBDL3,RHOT1,RHOT1,SLC25A39,RNF135	myosin ID [Source:HGNC Symbol;Acc:HGNC:7598],cyclin-dependent kinase 5, regulatory subunit 1 (p35) [Source:HGNC Symbol;Acc:HGNC:1775],N/A,N/A,proteasome (prosome, macropain) 26S subunit, non-ATPase, 11 [Source:HGNC Symbol;Acc:HGNC:9556],zinc finger protein 207 [Source:HGNC Symbol;Acc:HGNC:12998],zinc finger protein 207 [Source:HGNC Symbol;Acc:HGNC:12998],microRNA 632 [Source:HGNC Symbol;Acc:HGNC:…
9	41496435	41757635	636	261201	ENSCAFT00000046191,ENSCAFT00000029545,ENSCAFT00000044366,ENSCAFT00000029563,ENSCAFT00000029565	NF1,NF1,EVI2A,CTD-2370N5.3,EVI2B,OMG	neurofibromin 1 [Source:HGNC Symbol;Acc:HGNC:7765],neurofibromin 1 [Source:HGNC Symbol;Acc:HGNC:7765],ecotropic viral integration site 2A [Source:HGNC Symbol;Acc:HGNC:3499],Uncharacterized protein [Source:UniProtKB/TrEMBL;Acc:J3QS37],ecotropic viral integration site 2B [Source:HGNC Symbol;Acc:HGNC:3500],oligodendrocyte myelin glycoprotein [Source:HGNC Symbol;Acc:HGNC:8135]
9	42681674	44483998	4070	1802325	ENSCAFT00000029696,ENSCAFT00000029700,ENSCAFT00000029702,ENSCAFT00000029708,ENSCAFT00000040385,ENSCAFT00000037104,ENSCAFT00000029710,ENSCAFT00000029722,ENSCAFT00000045941,ENSCAFT00000029728,ENSCAFT00000029756,ENSCAFT00000047458,ENSCAFT00000029797,ENSCAFT00000029805,ENSCAFT00000036036,ENSCAFT00000043143,ENSCAFT00000029814,ENSCAFT00000033799,ENSCAFT00000040259,ENSCAFT00000040254,ENSCAFT00000044723,…	SLC13A2,FOXN1,UNC119,PIGS,N/A,ALDOC,ALDOC,RP11-192H23.4,SPAG5,N/A,SGK494,KIAA0100,SDF2,SUPT6H,PROCA1,RAB34,TLCD1,RPL23A,SNORD42B,SNORD4A,SNORD42A,NEK8,NEK8,TRAF4,FAM222B,ERAL1,MIR451A,MIR144,FLOT2,FLOT2,PHF12,SEZ6,SEZ6,PIPOX,MYO18A,MYO18A,CRYBA1,NUFIP2,TAOK1,N/A,ABHD15,ABHD15,TP53I13,GIT1,GIT1,ANKRD13B,ANKRD13B,CORO6,CORO6,SSH2,SSH2,SNOU2-30,SNOU2_19,SNOU2_19,EFCAB5,EFCAB5,EFCAB5,EFCAB5,MAPK3,NSR…	solute carrier family 13 (sodium-dependent dicarboxylate transporter), member 2 [Source:HGNC Symbol;Acc:HGNC:10917],forkhead box N1 [Source:HGNC Symbol;Acc:HGNC:12765],unc-119 lipid binding chaperone [Source:HGNC Symbol;Acc:HGNC:12565],phosphatidylinositol glycan anchor biosynthesis, class S [Source:HGNC Symbol;Acc:HGNC:14937],N/A,aldolase C, fructose-bisphosphate [Source:HGNC Symbol;Acc:HGNC:418…
9	44656015	46678305	5121	2022291	ENSCAFT00000030275,ENSCAFT00000030278,ENSCAFT00000047716,ENSCAFT00000046396,ENSCAFT00000030294,ENSCAFT00000049494,ENSCAFT00000030363,ENSCAFT00000030372,ENSCAFT00000030378,ENSCAFT00000037731,ENSCAFT00000044283,ENSCAFT00000030379,ENSCAFT00000030338,ENSCAFT00000030382,ENSCAFT00000050161,ENSCAFT00000030385,ENSCAFT00000044656,ENSCAFT00000048499,ENSCAFT00000050167,ENSCAFT00000034354,ENSCAFT00000044584,…	ABR,ABR,TIMM22,TMSB4X,NXN,NXN,RNMTL1,GLOD4,N/A,GEMIN4,FAM57A,FAM57A,VPS53,FAM101B,C17ORF97,RPH3AL,RPH3AL,N/A,DOC2B,N/A,YWHAE,CRK,MYO1C,MYO1C,INPP5K,PITPNA,PITPNA,SLC43A2,SCARF1,N/A,RILP,PRPF8,RNU6-1300P,TLCD2,N/A,MIR22,WDR81,SERPINF2,SERPINF1,SMYD4,SMYD4,RPA1,RTN4RL1,DPH1,DPH1,OVCA2,MIR132,MIR212,HIC1,SMG6,LSM5,SGSM2,SGSM2,TSR1,TSR1,N/A,N/A,MNT,METTL16,RN7SKP160,RN7SKP174,PAFAH1B1	active BCR-related [Source:HGNC Symbol;Acc:HGNC:81],active BCR-related [Source:HGNC Symbol;Acc:HGNC:81],translocase of inner mitochondrial membrane 22 homolog (yeast) [Source:HGNC Symbol;Acc:HGNC:17317],thymosin beta 4, X-linked [Source:HGNC Symbol;Acc:HGNC:11881],nucleoredoxin [Source:HGNC Symbol;Acc:HGNC:18008],nucleoredoxin [Source:HGNC Symbol;Acc:HGNC:18008],RNA methyltransferase like 1 [Sour…
9	47047746	47317381	2235	269636	ENSCAFT00000030682,ENSCAFT00000036267,ENSCAFT00000030690,ENSCAFT00000048329,ENSCAFT00000030694,ENSCAFT00000030695,ENSCAFT00000030696,ENSCAFT00000030697,ENSCAFT00000035349	OR1D5,OR1D2,OR1A2,OR1A1,OR1N1,OR3A1,N/A,GNG10,N/A,N/A,OR1E2,OR1E1	olfactory receptor, family 1, subfamily D, member 5 [Source:HGNC Symbol;Acc:HGNC:8186],olfactory receptor, family 1, subfamily D, member 2 [Source:HGNC Symbol;Acc:HGNC:8183],olfactory receptor, family 1, subfamily A, member 2 [Source:HGNC Symbol;Acc:HGNC:8180],olfactory receptor, family 1, subfamily A, member 1 [Source:HGNC Symbol;Acc:HGNC:8179],olfactory receptor, family 1, subfamily N, member 1…
9	47778777	47788830	260	10054
9	47960265	49743857	4700	1783593	ENSCAFT00000030804,ENSCAFT00000030827,ENSCAFT00000030832,ENSCAFT00000030838,ENSCAFT00000030845,ENSCAFT00000030846,ENSCAFT00000030881,ENSCAFT00000030896,ENSCAFT00000049903,ENSCAFT00000030900,ENSCAFT00000030899,ENSCAFT00000030907,ENSCAFT00000030909,ENSCAFT00000030921,ENSCAFT00000030923,ENSCAFT00000030924,ENSCAFT00000030929,ENSCAFT00000030935,ENSCAFT00000030948,ENSCAFT00000030939,ENSCAFT00000030955,…	CACNA1B,EHMT1,ARRDC1,ZMYND19,DPH7,MRPL41,PNPLA7,NSMF,NSMF,ENTPD8,ENTPD8,NOXA1,NOXA1,EXD3,NRARP,TOR4A,NELFB,C9ORF173,TUBB4B,FAM166A,RNF208,SLC34A3,RNF224,NDOR1,TMEM203,TPRN,TMEM210,SSNA1,TMEM210,LRRC26,GRIN1,GRIN1,GRIN1,GRIN1,GRIN1,UAP1L1,MAN1B1,DPP7,MAN1B1,UAP1L1,SAPCD2,ENTPD2,NPDC1,FUT7,FUT7,ABCA2,CLIC3,C9ORF142,C9ORF142,LCNL1,PTGDS,PTGDS,LCN12,C8G,C8G,FBXW5,TRAF2,N/A,TRAF2,TRAF2,EDF1,MAMDC4,MAM…	calcium channel, voltage-dependent, N type, alpha 1B subunit [Source:HGNC Symbol;Acc:HGNC:1389],euchromatic histone-lysine N-methyltransferase 1 [Source:HGNC Symbol;Acc:HGNC:24650],arrestin domain containing 1 [Source:HGNC Symbol;Acc:HGNC:28633],zinc finger, MYND-type containing 19 [Source:HGNC Symbol;Acc:HGNC:21146],diphthamide biosynthesis 7 [Source:HGNC Symbol;Acc:HGNC:25199],mitochondrial rib…
9	49919651	56880256	24442	6960606	ENSCAFT00000031449,ENSCAFT00000048186,ENSCAFT00000031457,ENSCAFT00000031482,ENSCAFT00000031512,ENSCAFT00000041432,ENSCAFT00000031538,ENSCAFT00000034698,ENSCAFT00000031546,ENSCAFT00000031555,ENSCAFT00000040842,ENSCAFT00000031582,ENSCAFT00000044143,ENSCAFT00000043238,ENSCAFT00000049609,ENSCAFT00000031601,ENSCAFT00000047176,ENSCAFT00000031602,ENSCAFT00000042898,ENSCAFT00000031603,ENSCAFT00000031606,…	ADAMTSL2,FAM163B,DBH,SARDH,VAV2,RNU6-1338P,BRD3,RNU6-1084P,WDR5,RXRA,N/A,COL5A1,COL5A1,FCN2,FCN1,OLFM1,PPP1R26,N/A,MRPS2,N/A,N/A,GBGT1,RALGDS,RALGDS,CEL,CEL,GTF3C5,GFI1B,MDH2,TSC1,TSC1,C9ORF9,C9ORF9,AK8,GTF3C4,BARHL1,C9ORF171,TTF1,SETX,NTNG2,MED27,SNORA63,SNORA63,RAPGEF1,RAPGEF1,PRRC2B,UCK1,POMT1,SNORD62B,SNORD62A,SNORD62,PPAPDC3,FAM78A,NUP214,N/A,AIF1L,N/A,LAMC3,LAMC3,FIBCD1,QRFP,ABL1,ABL1,EXOSC…	ADAMTS-like 2 [Source:HGNC Symbol;Acc:HGNC:14631],family with sequence similarity 163, member B [Source:HGNC Symbol;Acc:HGNC:33277],dopamine beta-hydroxylase (dopamine beta-monooxygenase) [Source:HGNC Symbol;Acc:HGNC:2689],sarcosine dehydrogenase [Source:HGNC Symbol;Acc:HGNC:10536],vav 2 guanine nucleotide exchange factor [Source:HGNC Symbol;Acc:HGNC:12658],RNA, U6 small nuclear 1338, pseudogene …
9	57251263	57707620	1322	456358	ENSCAFT00000032127,ENSCAFT00000032129,ENSCAFT00000040178	PBX3,MAPKAP1,SNORA72	pre-B-cell leukemia homeobox 3 [Source:HGNC Symbol;Acc:HGNC:8634],mitogen-activated protein kinase associated protein 1 [Source:HGNC Symbol;Acc:HGNC:18752],Small nucleolar RNA SNORA72 [Source:RFAM;Acc:RF00139]
9	57894446	58542703	1743	648258	ENSCAFT00000044164,ENSCAFT00000032181,ENSCAFT00000032188,ENSCAFT00000043402,ENSCAFT00000032194,ENSCAFT00000032195,ENSCAFT00000040636,ENSCAFT00000045489,ENSCAFT00000032577,ENSCAFT00000039996,ENSCAFT00000032203,ENSCAFT00000034199,ENSCAFT00000032206,ENSCAFT00000046945,ENSCAFT00000032210	N/A,SCAI,GOLGA1,ARPC5L,RPL35,WDR38,RNU6-1322P,RNU6-1004P,RNU6-285P,OLFML2A,MIR181B2,MIR181A2,NR6A1,RNU6-431P,NR5A1,ADGRD2,PSMB7	N/A,suppressor of cancer cell invasion [Source:HGNC Symbol;Acc:HGNC:26709],golgin A1 [Source:HGNC Symbol;Acc:HGNC:4424],actin related protein 2/3 complex, subunit 5-like [Source:HGNC Symbol;Acc:HGNC:23366],ribosomal protein L35 [Source:HGNC Symbol;Acc:HGNC:10344],WD repeat domain 38 [Source:HGNC Symbol;Acc:HGNC:23745],RNA, U6 small nuclear 1322, pseudogene [Source:HGNC Symbol;Acc:HGNC:48285],RNA,…
9	59864913	59864988	9	76
9	60026635	60174294	1282	147660	ENSCAFT00000032266,ENSCAFT00000035470,ENSCAFT00000032268,ENSCAFT00000032270	TDRD3,OR1L4,OR1L6,N/A,OR1L8	tudor domain containing 3 [Source:HGNC Symbol;Acc:HGNC:20612],olfactory receptor, family 1, subfamily L, member 4 [Source:HGNC Symbol;Acc:HGNC:8216],olfactory receptor, family 1, subfamily L, member 6 [Source:HGNC Symbol;Acc:HGNC:8218],N/A,olfactory receptor, family 1, subfamily L, member 8 [Source:HGNC Symbol;Acc:HGNC:15110]
9	60430942	60430966	12	25
9	61046344	61073775	163	27432
10	18402064	18627726	781	225663
10	18651936	18718079	205	66144
11	4115400	4274072	545	158673
11	10586536	10698221	314	111686
11	12395456	12589798	676	194343
11	12589829	12756224	628	166396	ENSCAFT00000014127,ENSCAFT00000038741	N/A,SNX2	N/A,sorting nexin 2 [Source:HGNC Symbol;Acc:HGNC:11173]
11	15884228	15917052	161	32825	ENSCAFT00000048672,ENSCAFT00000000909,ENSCAFT00000000911	PHAX,PHAX,TEX43	phosphorylated adaptor for RNA export [Source:HGNC Symbol;Acc:HGNC:10241],phosphorylated adaptor for RNA export [Source:HGNC Symbol;Acc:HGNC:10241],testis expressed 43 [Source:HGNC Symbol;Acc:HGNC:33767]
11	17962641	17982093	66	19453	ENSCAFT00000001116	SLC27A6	solute carrier family 27 (fatty acid transporter), member 6 [Source:HGNC Symbol;Acc:HGNC:11000]
11	19445777	19445900	8	124
11	19626423	21244598	3501	1618176	ENSCAFT00000001140,ENSCAFT00000043373,ENSCAFT00000042595,ENSCAFT00000001169,ENSCAFT00000001172,ENSCAFT00000046701,ENSCAFT00000041157,ENSCAFT00000001183,ENSCAFT00000037823,ENSCAFT00000041169,ENSCAFT00000043409,ENSCAFT00000043983,ENSCAFT00000001273,ENSCAFT00000001280,ENSCAFT00000036668,ENSCAFT00000001284,ENSCAFT00000001289,ENSCAFT00000001294,ENSCAFT00000040663,ENSCAFT00000001320,ENSCAFT00000001324,…	CDC42SE2,CDC42SE2,RNU6-484P,RNU6-812P,RAPGEF6,CTC-432M15.3,CTC-432M15.3,RAPGEF6,RAPGEF6,CTC-432M15.3,N/A,FNIP1,ATP5J2,RN7SKP198,MEIKIN,ACSL6,ACSL6,ACSL6,ACSL6,N/A,CSF2,CSF2,P4HA2,PDLIM4,RNU6-770P,SLC22A4,SLC22A5,N/A,IRF1,IL5,IL5,RAD50,RAD50,N/A,N/A,IL13,IL4,IL4,KIF3A,KIF3A,KIF3A,CCNI2,SEPT8,N/A,SOWAHA,SHROOM1,GDF9,UQCRQ,LEAP2,AFF4,AFF4	CDC42 small effector 2 [Source:HGNC Symbol;Acc:HGNC:18547],CDC42 small effector 2 [Source:HGNC Symbol;Acc:HGNC:18547],RNA, U6 small nuclear 484, pseudogene [Source:HGNC Symbol;Acc:HGNC:47447],RNA, U6 small nuclear 812, pseudogene [Source:HGNC Symbol;Acc:HGNC:47775],Rap guanine nucleotide exchange factor (GEF) 6 [Source:HGNC Symbol;Acc:HGNC:20655],Uncharacterized protein [Source:UniProtKB/TrEMBL;A…
11	21420342	21421094	59	753
12	80443	272361	677	191919	ENSCAFT00000000005,ENSCAFT00000000580,ENSCAFT00000000591,ENSCAFT00000000597,ENSCAFT00000033145,ENSCAFT00000000605,ENSCAFT00000000601	ENPP3,ENPP3,ATP5L,ATP5L2,MED23,RNU4-77P,ARG1,ARG1	ectonucleotide pyrophosphatase/phosphodiesterase 3 [Source:HGNC Symbol;Acc:HGNC:3358],ectonucleotide pyrophosphatase/phosphodiesterase 3 [Source:HGNC Symbol;Acc:HGNC:3358],ATP synthase, H+ transporting, mitochondrial Fo complex, subunit G [Source:HGNC Symbol;Acc:HGNC:14247],ATP synthase, H+ transporting, mitochondrial Fo complex, subunit G2 [Source:HGNC Symbol;Acc:HGNC:13213],mediator complex sub…
12	346827	389398	119	42572	ENSCAFT00000000627,ENSCAFT00000042515	GNL1,RNU4-37P	guanine nucleotide binding protein-like 1 [Source:HGNC Symbol;Acc:HGNC:4413],RNA, U4 small nuclear 37, pseudogene [Source:HGNC Symbol;Acc:HGNC:46973]
12	1153455	1154414	10	960	ENSCAFT00000037840	CSNK2B	casein kinase 2, beta polypeptide [Source:HGNC Symbol;Acc:HGNC:2460]
12	1926114	2123248	1259	197135	ENSCAFT00000001246,ENSCAFT00000001248,ENSCAFT00000001247,ENSCAFT00000001240	N/A,BTNL2,N/A,N/A	N/A,butyrophilin-like 2 [Source:HGNC Symbol;Acc:HGNC:1142],N/A,N/A
12	5278052	5278109	4	58
12	5532322	5544253	51	11932
12	6242077	6439521	637	197445	ENSCAFT00000002260,ENSCAFT00000035352,ENSCAFT00000041766,ENSCAFT00000002276,ENSCAFT00000047572,ENSCAFT00000002283	N/A,TMEM217,N/A,TBC1D22B,RNF8,RNF8	N/A,transmembrane protein 217 [Source:HGNC Symbol;Acc:HGNC:21238],N/A,TBC1 domain family, member 22B [Source:HGNC Symbol;Acc:HGNC:21602],ring finger protein 8, E3 ubiquitin protein ligase [Source:HGNC Symbol;Acc:HGNC:10071],ring finger protein 8, E3 ubiquitin protein ligase [Source:HGNC Symbol;Acc:HGNC:10071]
14	10593064	10594038	5	975
14	16597438	16600862	15	3425	ENSCAFT00000003009,ENSCAFT00000049748	CDK14,CDK14	cyclin-dependent kinase 14 [Source:HGNC Symbol;Acc:HGNC:8883],cyclin-dependent kinase 14 [Source:HGNC Symbol;Acc:HGNC:8883]
14	31922986	32151326	953	228341	ENSCAFT00000040841,ENSCAFT00000003865,ENSCAFT00000003870	N/A,N/A,MCMBP	N/A,N/A,minichromosome maintenance complex binding protein [Source:HGNC Symbol;Acc:HGNC:25782]
14	34619293	34709348	167	90056	ENSCAFT00000004202	ABCB5	ATP-binding cassette, sub-family B (MDR/TAP), member 5 [Source:HGNC Symbol;Acc:HGNC:46]
14	35338464	35338477	3	14
14	36340916	36340932	4	17
14	36501756	36502363	15	608
14	38229116	38229154	3	39	ENSCAFT00000004515	DFNA5	deafness, autosomal dominant 5 [Source:HGNC Symbol;Acc:HGNC:2810]
14	39478405	39478407	2	3	ENSCAFT00000004584	NFE2L3	nuclear factor, erythroid 2-like 3 [Source:HGNC Symbol;Acc:HGNC:7783]
14	39999670	40338038	1019	338369	ENSCAFT00000004676,ENSCAFT00000004700,ENSCAFT00000045559,ENSCAFT00000046100,ENSCAFT00000043484,ENSCAFT00000044535,ENSCAFT00000004713,ENSCAFT00000046660,ENSCAFT00000004722,ENSCAFT00000004723,ENSCAFT00000004729,ENSCAFT00000004737,ENSCAFT00000004746	SKAP2,HOXA1,HOTAIRM1_1,HOTAIRM1_2,HOTAIRM1_4,HOTAIRM1_5,HOXA2,HOXA3,HOXA4,HOXA5,HOXA6,HOXA7,HOXA9	src kinase associated phosphoprotein 2 [Source:HGNC Symbol;Acc:HGNC:15687],homeobox A1 [Source:HGNC Symbol;Acc:HGNC:5099],HOX antisense intergenic RNA myeloid 1 conserved region 1 [Source:RFAM;Acc:RF01975],HOX antisense intergenic RNA myeloid 1 conserved region 2 [Source:RFAM;Acc:RF01976],HOX antisense intergenic RNA myeloid 1 conserved region 4 [Source:RFAM;Acc:RF01978],HOX antisense intergenic …
14	41143257	41143956	15	700	ENSCAFT00000004816	JAZF1	JAZF zinc finger 1 [Source:HGNC Symbol;Acc:HGNC:28917]
14	44140351	44240355	709	100005	ENSCAFT00000005026,ENSCAFT00000005024,ENSCAFT00000048480	CCDC129,CCDC129,PPP1R17	coiled-coil domain containing 129 [Source:HGNC Symbol;Acc:HGNC:27363],coiled-coil domain containing 129 [Source:HGNC Symbol;Acc:HGNC:27363],protein phosphatase 1, regulatory subunit 17 [Source:HGNC Symbol;Acc:HGNC:16973]
14	48839913	48839936	3	24
14	49451816	49451844	4	29
14	52630865	52639933	62	9069
14	54722425	54722425	1	1
14	57463103	57467208	37	4106
16	6766509	6766509	1	1
16	11157650	11554582	1545	396933	ENSCAFT00000005413,ENSCAFT00000044633,ENSCAFT00000039584,ENSCAFT00000005402,ENSCAFT00000042656,ENSCAFT00000005392	DGKI,DGKI,PTN,PTN,SNORA31,CHRM2	diacylglycerol kinase, iota [Source:HGNC Symbol;Acc:HGNC:2855],diacylglycerol kinase, iota [Source:HGNC Symbol;Acc:HGNC:2855],pleiotrophin [Source:HGNC Symbol;Acc:HGNC:9630],pleiotrophin [Source:HGNC Symbol;Acc:HGNC:9630],Small nucleolar RNA SNORA31 [Source:RFAM;Acc:RF00322],cholinergic receptor, muscarinic 2 [Source:HGNC Symbol;Acc:HGNC:1951]
16	16546683	16716960	602	170278	ENSCAFT00000047836,ENSCAFT00000007994,ENSCAFT00000008016	ACTR3B,ACTR3C,ACTR3B,ACTR3C,N/A	ARP3 actin-related protein 3 homolog B (yeast) [Source:HGNC Symbol;Acc:HGNC:17256],ARP3 actin-related protein 3 homolog C (yeast) [Source:HGNC Symbol;Acc:HGNC:37282],ARP3 actin-related protein 3 homolog B (yeast) [Source:HGNC Symbol;Acc:HGNC:17256],ARP3 actin-related protein 3 homolog C (yeast) [Source:HGNC Symbol;Acc:HGNC:37282],N/A
16	17965898	18143345	566	177448	ENSCAFT00000008117,ENSCAFT00000008164,ENSCAFT00000008169	DPP6,PAXIP1,HTR5A	dipeptidyl-peptidase 6 [Source:HGNC Symbol;Acc:HGNC:3010],PAX interacting (with transcription-activation domain) protein 1 [Source:HGNC Symbol;Acc:HGNC:8624],5-hydroxytryptamine (serotonin) receptor 5A, G protein-coupled [Source:HGNC Symbol;Acc:HGNC:5300]
16	18501609	18501925	9	317	ENSCAFT00000038577	RBM33	RNA binding motif protein 33 [Source:HGNC Symbol;Acc:HGNC:27223]
16	18965446	18965622	6	177
16	19174589	19230957	230	56369
16	20685242	20886862	837	201621	ENSCAFT00000008416,ENSCAFT00000047281,ENSCAFT00000008433,ENSCAFT00000047430,ENSCAFT00000008456	NCAPG2,ESYT2,ESYT2,WDR60,WDR60	non-SMC condensin II complex, subunit G2 [Source:HGNC Symbol;Acc:HGNC:21904],extended synaptotagmin-like protein 2 [Source:HGNC Symbol;Acc:HGNC:22211],extended synaptotagmin-like protein 2 [Source:HGNC Symbol;Acc:HGNC:22211],WD repeat domain 60 [Source:HGNC Symbol;Acc:HGNC:21862],WD repeat domain 60 [Source:HGNC Symbol;Acc:HGNC:21862]
16	22077554	22077586	5	33
16	22285948	22286388	8	441	ENSCAFT00000008601	CSGALNACT1	chondroitin sulfate N-acetylgalactosaminyltransferase 1 [Source:HGNC Symbol;Acc:HGNC:24290]
16	22957328	23130550	587	173223	ENSCAFT00000008765,ENSCAFT00000008776,ENSCAFT00000008790	CHRNA6,CHRNA6,CHRNB3	cholinergic receptor, nicotinic, alpha 6 (neuronal) [Source:HGNC Symbol;Acc:HGNC:15963],cholinergic receptor, nicotinic, alpha 6 (neuronal) [Source:HGNC Symbol;Acc:HGNC:15963],cholinergic receptor, nicotinic, beta 3 (neuronal) [Source:HGNC Symbol;Acc:HGNC:1963]
17	7839041	7839083	4	43
18	6364546	6598187	711	233642	ENSCAFT00000005592,ENSCAFT00000046211,ENSCAFT00000005594,ENSCAFT00000049832	BLVRA,COA1,STK17A,STK17A	biliverdin reductase A [Source:HGNC Symbol;Acc:HGNC:1062],cytochrome c oxidase assembly factor 1 homolog [Source:HGNC Symbol;Acc:HGNC:21868],serine/threonine kinase 17a [Source:HGNC Symbol;Acc:HGNC:11395],serine/threonine kinase 17a [Source:HGNC Symbol;Acc:HGNC:11395]
18	13936151	14014266	345	78116
18	14027132	14027158	2	27
18	14291671	14784418	1854	492748	ENSCAFT00000006408,ENSCAFT00000006412,ENSCAFT00000006418,ENSCAFT00000049388,ENSCAFT00000006423	SYPL1,N/A,CDHR3,ATXN7L1,ATXN7L1	synaptophysin-like 1 [Source:HGNC Symbol;Acc:HGNC:11507],N/A,cadherin-related family member 3 [Source:HGNC Symbol;Acc:HGNC:26308],ataxin 7-like 1 [Source:HGNC Symbol;Acc:HGNC:22210],ataxin 7-like 1 [Source:HGNC Symbol;Acc:HGNC:22210]
18	15741844	16313088	1927	571245	ENSCAFT00000006657,ENSCAFT00000047394,ENSCAFT00000039321	ORC5,RELN,RELN	origin recognition complex, subunit 5 [Source:HGNC Symbol;Acc:HGNC:8491],reelin [Source:HGNC Symbol;Acc:HGNC:9957],reelin [Source:HGNC Symbol;Acc:HGNC:9957]
18	20301578	20494442	876	192865	ENSCAFT00000010354,ENSCAFT00000010317	CD36,SEMA3C	CD36 molecule (thrombospondin receptor) [Source:HGNC Symbol;Acc:HGNC:1663],sema domain, immunoglobulin domain (Ig), short basic domain, secreted, (semaphorin) 3C [Source:HGNC Symbol;Acc:HGNC:10725]
18	20907202	20907213	2	12
18	21899813	21899821	2	9	ENSCAFT00000010276	CACNA2D1	calcium channel, voltage-dependent, alpha 2/delta subunit 1 [Source:HGNC Symbol;Acc:HGNC:1399]
18	22063497	22221090	659	157594
18	22732820	22732919	10	100
18	22924336	22924406	2	71	ENSCAFT00000010102	SEMA3E	sema domain, immunoglobulin domain (Ig), short basic domain, secreted, (semaphorin) 3E [Source:HGNC Symbol;Acc:HGNC:10727]
18	23641691	23838886	853	197196
18	23977644	24186566	720	208923	ENSCAFT00000046185	N/A	N/A
18	24690281	24921871	837	231591
18	26180962	26562596	1404	381635	ENSCAFT00000044798,ENSCAFT00000010834,ENSCAFT00000010893	TTC17,TTC17,API5	tetratricopeptide repeat domain 17 [Source:HGNC Symbol;Acc:HGNC:25596],tetratricopeptide repeat domain 17 [Source:HGNC Symbol;Acc:HGNC:25596],apoptosis inhibitor 5 [Source:HGNC Symbol;Acc:HGNC:594]
18	26727207	26923084	946	195878
18	26923540	27196511	1573	272972
18	27199688	27460843	1615	261156
18	27460888	27973865	2606	512978	ENSCAFT00000040585,ENSCAFT00000041900	RN7SKP186,N/A	RNA, 7SK small nuclear pseudogene 186 [Source:HGNC Symbol;Acc:HGNC:45910],N/A
18	27974070	28264820	1593	290751
18	30271903	30343392	366	71490
18	30913287	30913757	7	471
18	31851380	31872248	74	20869	ENSCAFT00000010987	COMMD9	COMM domain containing 9 [Source:HGNC Symbol;Acc:HGNC:25014]
18	34647773	34905228	751	257456	ENSCAFT00000011713,ENSCAFT00000011725,ENSCAFT00000044660,ENSCAFT00000011756,ENSCAFT00000047338	QSER1,PRRG4,CCDC73,CCDC73,CCDC73	glutamine and serine rich 1 [Source:HGNC Symbol;Acc:HGNC:26154],proline rich Gla (G-carboxyglutamic acid) 4 (transmembrane) [Source:HGNC Symbol;Acc:HGNC:30799],coiled-coil domain containing 73 [Source:HGNC Symbol;Acc:HGNC:23261],coiled-coil domain containing 73 [Source:HGNC Symbol;Acc:HGNC:23261],coiled-coil domain containing 73 [Source:HGNC Symbol;Acc:HGNC:23261]
18	35107891	35107891	1	1
18	35518760	35518760	1	1
18	37606091	37722184	475	116094	ENSCAFT00000012262,ENSCAFT00000044267,ENSCAFT00000012244,ENSCAFT00000012264,ENSCAFT00000049330,ENSCAFT00000050051	GLYAT,FAM111B,FAM111B,GLYAT,N/A,GLYAT	glycine-N-acyltransferase [Source:HGNC Symbol;Acc:HGNC:13734],family with sequence similarity 111, member B [Source:HGNC Symbol;Acc:HGNC:24200],family with sequence similarity 111, member B [Source:HGNC Symbol;Acc:HGNC:24200],glycine-N-acyltransferase [Source:HGNC Symbol;Acc:HGNC:13734],N/A,glycine-N-acyltransferase [Source:HGNC Symbol;Acc:HGNC:13734]
18	39317239	39317385	5	147
18	39977050	39984505	114	7456
18	41425783	41425963	9	181
20	7308833	8221704	3206	912872	ENSCAFT00000008101,ENSCAFT00000008108,ENSCAFT00000049238,ENSCAFT00000008209,ENSCAFT00000040858,ENSCAFT00000040845,ENSCAFT00000008242,ENSCAFT00000008248,ENSCAFT00000008251,ENSCAFT00000049507,ENSCAFT00000046552,ENSCAFT00000008287,ENSCAFT00000008294	SLC6A1,SLC6A11,ATP2B2,ATP2B2,MIR885,N/A,SEC13,GHRL,RP11-438J1.1,TATDN2,RP11-438J1.1,TATDN2,IRAK2,IRAK2,IRAK2	solute carrier family 6 (neurotransmitter transporter), member 1 [Source:HGNC Symbol;Acc:HGNC:11042],solute carrier family 6 (neurotransmitter transporter), member 11 [Source:HGNC Symbol;Acc:HGNC:11044],ATPase, Ca++ transporting, plasma membrane 2 [Source:HGNC Symbol;Acc:HGNC:815],ATPase, Ca++ transporting, plasma membrane 2 [Source:HGNC Symbol;Acc:HGNC:815],microRNA 885 [Source:HGNC Symbol;Acc:H…
20	12139108	12217528	238	78421
20	13132264	13132419	8	156	ENSCAFT00000009609	SUMF1	sulfatase modifying factor 1 [Source:HGNC Symbol;Acc:HGNC:20376]
20	13945510	14007777	357	62268
20	15641176	15736508	267	95333
20	16391441	16394343	46	2903
20	16733198	16733248	11	51
20	17159638	17388524	1170	228887	ENSCAFT00000010209	AIMP1	aminoacyl tRNA synthetase complex-interacting multifunctional protein 1 [Source:HGNC Symbol;Acc:HGNC:10648]
20	17389084	17685846	1779	296763	ENSCAFT00000048666,ENSCAFT00000010232,ENSCAFT00000042679	PGK1,N/A,N/A	phosphoglycerate kinase 1 [Source:HGNC Symbol;Acc:HGNC:8896],N/A,N/A
20	17687210	18058835	1705	371626	ENSCAFT00000010310	CNTN3	contactin 3 (plasmacytoma associated) [Source:HGNC Symbol;Acc:HGNC:2173]
20	18058938	18274756	821	215819	ENSCAFT00000042385	SNORD30	Small nucleolar RNA SNORD30 [Source:RFAM;Acc:RF00088]
20	18274860	18350766	245	75907
20	18581858	18582065	9	208
20	18898761	18898780	4	20
20	19310225	19390518	106	80294	ENSCAFT00000010390	SHQ1	SHQ1, H/ACA ribonucleoprotein assembly factor [Source:HGNC Symbol;Acc:HGNC:25543]
20	19483851	19578703	403	94853
20	20007603	20688135	2835	680533	ENSCAFT00000048967,ENSCAFT00000010403,ENSCAFT00000042550	EIF4E3,EIF4E3,N/A	eukaryotic translation initiation factor 4E family member 3 [Source:HGNC Symbol;Acc:HGNC:31837],eukaryotic translation initiation factor 4E family member 3 [Source:HGNC Symbol;Acc:HGNC:31837],N/A
20	25928748	25928786	7	39	ENSCAFT00000047818	MAGI1	membrane associated guanylate kinase, WW and PDZ domain containing 1 [Source:HGNC Symbol;Acc:HGNC:946]
20	28680922	28894345	599	213424	ENSCAFT00000011406,ENSCAFT00000011412,ENSCAFT00000011507,ENSCAFT00000011505	FEZF2,C3ORF14,PTPRG,PTPRG	FEZ family zinc finger 2 [Source:HGNC Symbol;Acc:HGNC:13506],chromosome 3 open reading frame 14 [Source:HGNC Symbol;Acc:HGNC:25024],protein tyrosine phosphatase, receptor type, G [Source:HGNC Symbol;Acc:HGNC:9671],protein tyrosine phosphatase, receptor type, G [Source:HGNC Symbol;Acc:HGNC:9671]
20	31808720	31808720	1	1
20	32185536	32187441	14	1906	ENSCAFT00000011760	PDHB	pyruvate dehydrogenase (lipoamide) beta [Source:HGNC Symbol;Acc:HGNC:8808]
21	10256689	10321084	366	64396	ENSCAFT00000006960,ENSCAFT00000007004	N/A,TRIM77	N/A,tripartite motif containing 77 [Source:HGNC Symbol;Acc:HGNC:34228]
21	10575052	10577084	5	2033
21	10865629	10932077	439	66449	ENSCAFT00000007027,ENSCAFT00000033996	TYR,RNA5SP144	tyrosinase [Source:HGNC Symbol;Acc:HGNC:12442],RNA, 5S ribosomal pseudogene 144 [Source:HGNC Symbol;Acc:HGNC:43044]
21	13064432	13460643	1488	396212	ENSCAFT00000007134,ENSCAFT00000007152,ENSCAFT00000007178,ENSCAFT00000046444,ENSCAFT00000007206,ENSCAFT00000007234,ENSCAFT00000044406	ME3,N/A,CCDC81,C11ORF73,EED,PICALM,PICALM	malic enzyme 3, NADP(+)-dependent, mitochondrial [Source:HGNC Symbol;Acc:HGNC:6985],N/A,coiled-coil domain containing 81 [Source:HGNC Symbol;Acc:HGNC:26281],chromosome 11 open reading frame 73 [Source:HGNC Symbol;Acc:HGNC:26938],embryonic ectoderm development [Source:HGNC Symbol;Acc:HGNC:3188],phosphatidylinositol binding clathrin assembly protein [Source:HGNC Symbol;Acc:HGNC:15514],phosphatidyli…
21	14152725	14407631	713	254907
21	14888612	14888669	5	58
21	16850684	16854165	45	3482
22	12203419	12267673	185	64255
22	17207442	17439103	891	231662
22	17603391	17634765	110	31375
22	21745233	21745494	5	262
22	23559772	23786711	677	226940
22	23951188	24188910	610	237723	ENSCAFT00000007967,ENSCAFT00000007970	FTL,N/A	ferritin, light polypeptide [Source:HGNC Symbol;Acc:HGNC:3999],N/A
22	24810187	24811290	18	1104
22	29567839	29733891	622	166053	ENSCAFT00000008147,ENSCAFT00000041868	LMO7,N/A	LIM domain 7 [Source:HGNC Symbol;Acc:HGNC:6646],N/A
22	34883398	34883458	2	61
22	35592706	35595061	21	2356
22	35767722	35898699	439	130978
22	35899254	35899254	1	1
23	4529708	4710802	656	181095	ENSCAFT00000041992	RNA5SP249,RNA5SP73	RNA, 5S ribosomal pseudogene 249 [Source:HGNC Symbol;Acc:HGNC:43149],RNA, 5S ribosomal pseudogene 73 [Source:HGNC Symbol;Acc:HGNC:42850]
23	4846877	4848913	11	2037
23	5394198	5394490	3	293
23	5688424	5688424	1	1
23	6288822	6351200	284	62379	ENSCAFT00000007659	N/A	N/A
23	9838528	10048014	886	209487	ENSCAFT00000008263,ENSCAFT00000025880,ENSCAFT00000046647,ENSCAFT00000044245,ENSCAFT00000049427,ENSCAFT00000048408	ENTPD3,RPL14,ZNF619,ZNF620,N/A,ZNF621	ectonucleoside triphosphate diphosphohydrolase 3 [Source:HGNC Symbol;Acc:HGNC:3365],ribosomal protein L14 [Source:HGNC Symbol;Acc:HGNC:10305],zinc finger protein 619 [Source:HGNC Symbol;Acc:HGNC:26910],zinc finger protein 620 [Source:HGNC Symbol;Acc:HGNC:28742],N/A,zinc finger protein 621 [Source:HGNC Symbol;Acc:HGNC:24787]
23	16093889	16099365	33	5477
23	19354972	19355005	5	34
23	19695937	19719499	63	23563	ENSCAFT00000040883	AC099050.1	N/A
24	4275650	4428115	604	152466	ENSCAFT00000008651	SCP2D1	SCP2 sterol-binding domain containing 1 [Source:HGNC Symbol;Acc:HGNC:16211]
24	5561910	5783344	724	221435	ENSCAFT00000008876	PCSK2	proprotein convertase subtilisin/kexin type 2 [Source:HGNC Symbol;Acc:HGNC:8744]
24	6789988	6836603	124	46616	ENSCAFT00000050203	N/A	N/A
24	9569678	9569776	5	99	ENSCAFT00000009031	SPTLC3	serine palmitoyltransferase, long chain base subunit 3 [Source:HGNC Symbol;Acc:HGNC:16253]
24	10043667	10127885	466	84219
24	10689697	10731339	166	41643
24	10745039	10780707	264	35669
24	12202915	12202915	1	1
24	12495223	12498528	17	3306	ENSCAFT00000009167	PAK7	p21 protein (Cdc42/Rac)-activated kinase 7 [Source:HGNC Symbol;Acc:HGNC:15916]
24	14119760	14119792	4	33
24	14409255	14409492	14	238
24	14616754	14639401	172	22648
24	20661866	20715054	215	53189	ENSCAFT00000011193,ENSCAFT00000038934	DEFB127,DEFB126	defensin, beta 127 [Source:HGNC Symbol;Acc:HGNC:16206],defensin, beta 126 [Source:HGNC Symbol;Acc:HGNC:15900]
25	5695907	5894390	626	198484
25	6381760	6381999	6	240
25	6590970	6809133	634	218164	ENSCAFT00000040971	AL357514.1	N/A
25	11900332	12059840	427	159509	ENSCAFT00000010876,ENSCAFT00000010916	POLR1D,LNX2	polymerase (RNA) I polypeptide D, 16kDa [Source:HGNC Symbol;Acc:HGNC:20422],ligand of numb-protein X 2 [Source:HGNC Symbol;Acc:HGNC:20421]
25	13982315	14210094	694	227780	ENSCAFT00000011254,ENSCAFT00000011342,ENSCAFT00000011338,ENSCAFT00000027629,ENSCAFT00000011353	N/A,NUPL1,NUPL1,N/A,MTMR6	N/A,nucleoporin like 1 [Source:HGNC Symbol;Acc:HGNC:20261],nucleoporin like 1 [Source:HGNC Symbol;Acc:HGNC:20261],N/A,myotubularin related protein 6 [Source:HGNC Symbol;Acc:HGNC:7453]
25	15146694	15146834	7	141
25	20335743	20471447	523	135705	ENSCAFT00000048958,ENSCAFT00000012239,ENSCAFT00000042543	NEK1,NEK1,RNA5SP66,RNA5SP109,RNA5SP345	NIMA-related kinase 1 [Source:HGNC Symbol;Acc:HGNC:7744],NIMA-related kinase 1 [Source:HGNC Symbol;Acc:HGNC:7744],RNA, 5S ribosomal pseudogene 66 [Source:HGNC Symbol;Acc:HGNC:42843],RNA, 5S ribosomal pseudogene 109 [Source:HGNC Symbol;Acc:HGNC:42907],RNA, 5S ribosomal pseudogene 345 [Source:HGNC Symbol;Acc:HGNC:43245]
25	21886798	21887058	9	261
25	22570276	22570531	4	256
25	22987024	22987024	1	1
25	23577832	23577940	3	109	ENSCAFT00000012464	GALNTL6	polypeptide N-acetylgalactosaminyltransferase-like 6 [Source:HGNC Symbol;Acc:HGNC:33844]
25	30384920	30384969	6	50
25	30565084	30580673	73	15590
25	30871598	30871627	5	30
25	31613313	31613329	5	17	ENSCAFT00000014211	EBF2	early B-cell factor 2 [Source:HGNC Symbol;Acc:HGNC:19090]
25	31951479	32098149	607	146671	ENSCAFT00000046597,ENSCAFT00000014238,ENSCAFT00000014259,ENSCAFT00000014273,ENSCAFT00000014320,ENSCAFT00000033122	CDCA2,CDCA2,KCTD9,GNRH1,DOCK5,RNA5SP77,RNA5SP19,RNA5SP520,RNA5SP523,RNA5SP359	cell division cycle associated 2 [Source:HGNC Symbol;Acc:HGNC:14623],cell division cycle associated 2 [Source:HGNC Symbol;Acc:HGNC:14623],potassium channel tetramerization domain containing 9 [Source:HGNC Symbol;Acc:HGNC:22401],gonadotropin-releasing hormone 1 (luteinizing-releasing hormone) [Source:HGNC Symbol;Acc:HGNC:4419],dedicator of cytokinesis 5 [Source:HGNC Symbol;Acc:HGNC:23476],RNA, 5S …
26	5161503	5240742	266	79240
26	13322184	13560902	905	238719	ENSCAFT00000014760,ENSCAFT00000044155,ENSCAFT00000014763,ENSCAFT00000014764,ENSCAFT00000046460,ENSCAFT00000014770	N/A,RNFT2,RNFT2,HRK,FBXW8,FBXW8	N/A,ring finger protein, transmembrane 2 [Source:HGNC Symbol;Acc:HGNC:25905],ring finger protein, transmembrane 2 [Source:HGNC Symbol;Acc:HGNC:25905],harakiri, BCL2 interacting protein [Source:HGNC Symbol;Acc:HGNC:5185],F-box and WD repeat domain containing 8 [Source:HGNC Symbol;Acc:HGNC:13597],F-box and WD repeat domain containing 8 [Source:HGNC Symbol;Acc:HGNC:13597]
26	13633461	13633461	1	1	ENSCAFT00000046460,ENSCAFT00000014770	FBXW8,FBXW8	F-box and WD repeat domain containing 8 [Source:HGNC Symbol;Acc:HGNC:13597],F-box and WD repeat domain containing 8 [Source:HGNC Symbol;Acc:HGNC:13597]
26	14712149	14917633	881	205485	ENSCAFT00000015797,ENSCAFT00000015826	TAOK3,SUDS3	TAO kinase 3 [Source:HGNC Symbol;Acc:HGNC:18133],suppressor of defective silencing 3 homolog (S. cerevisiae) [Source:HGNC Symbol;Acc:HGNC:29545]
26	15834881	15834948	6	68	ENSCAFT00000016092	CIT	citron rho-interacting serine/threonine kinase [Source:HGNC Symbol;Acc:HGNC:1985]
26	17095091	17292982	693	197892	ENSCAFT00000016937,ENSCAFT00000017114,ENSCAFT00000017127,ENSCAFT00000017136,ENSCAFT00000017196	ANKRD13A,GIT2,TCHP,GLTP,GLTP	ankyrin repeat domain 13A [Source:HGNC Symbol;Acc:HGNC:21268],G protein-coupled receptor kinase interacting ArfGAP 2 [Source:HGNC Symbol;Acc:HGNC:4273],trichoplein, keratin filament binding [Source:HGNC Symbol;Acc:HGNC:28135],glycolipid transfer protein [Source:HGNC Symbol;Acc:HGNC:24867],glycolipid transfer protein [Source:HGNC Symbol;Acc:HGNC:24867]
26	17293061	17293067	2	7	ENSCAFT00000017196	GLTP	glycolipid transfer protein [Source:HGNC Symbol;Acc:HGNC:24867]
26	17906004	17906044	6	41	ENSCAFT00000017724	UNG	uracil DNA glycosylase [Source:HGNC Symbol;Acc:HGNC:12572]
26	18894418	18894434	4	17
26	19329153	19329173	5	21
26	19329386	19419457	246	90072	ENSCAFT00000018482	ADRBK2	adrenergic, beta, receptor kinase 2 [Source:HGNC Symbol;Acc:HGNC:290]
26	27627923	27769081	648	141159	ENSCAFT00000022447,ENSCAFT00000046419,ENSCAFT00000036896,ENSCAFT00000043448,ENSCAFT00000021641,ENSCAFT00000036313	IGLC2,IGLC7,IGLC1,IGLC3,IGLL1,IGLL5,N/A,N/A,N/A,RSPH14,RSPH14	immunoglobulin lambda constant 2 (Kern-Oz- marker) [Source:HGNC Symbol;Acc:HGNC:5856],immunoglobulin lambda constant 7 [Source:HGNC Symbol;Acc:HGNC:5861],immunoglobulin lambda constant 1 (Mcg marker) [Source:HGNC Symbol;Acc:HGNC:5855],immunoglobulin lambda constant 3 (Kern-Oz+ marker) [Source:HGNC Symbol;Acc:HGNC:5857],immunoglobulin lambda-like polypeptide 1 [Source:HGNC Symbol;Acc:HGNC:5870],im…
26	29937169	29938577	31	1409	ENSCAFT00000023485	CLTCL1	clathrin, heavy chain-like 1 [Source:HGNC Symbol;Acc:HGNC:2093]
26	31599088	31599088	1	1
26	32338518	32338536	4	19
26	32521903	32570895	313	48993
26	32855804	32855809	2	6
26	36305857	36305923	6	67
28	437502	867033	1472	429532	ENSCAFT00000010591,ENSCAFT00000043002,ENSCAFT00000010609,ENSCAFT00000010643,ENSCAFT00000010630,ENSCAFT00000010647	ARHGAP22,ARHGAP22,WDFY4,WDFY4,WDFY4,LRRC18	Rho GTPase activating protein 22 [Source:HGNC Symbol;Acc:HGNC:30320],Rho GTPase activating protein 22 [Source:HGNC Symbol;Acc:HGNC:30320],WDFY family member 4 [Source:HGNC Symbol;Acc:HGNC:29323],WDFY family member 4 [Source:HGNC Symbol;Acc:HGNC:29323],WDFY family member 4 [Source:HGNC Symbol;Acc:HGNC:29323],leucine rich repeat containing 18 [Source:HGNC Symbol;Acc:HGNC:23199]
28	1054942	1054982	6	41
28	1205882	1215686	36	9805
28	3022601	3096553	461	73953
28	3185338	3247506	354	62169
28	3482506	3614535	433	132030	ENSCAFT00000044405,ENSCAFT00000043066,ENSCAFT00000048649	ZNF32,ZNF485,ZNF239	zinc finger protein 32 [Source:HGNC Symbol;Acc:HGNC:13095],zinc finger protein 485 [Source:HGNC Symbol;Acc:HGNC:23440],zinc finger protein 239 [Source:HGNC Symbol;Acc:HGNC:13031]
28	4728692	4814090	424	85399
28	7047058	7153549	372	106492	ENSCAFT00000012018	HHEX	hematopoietically expressed homeobox [Source:HGNC Symbol;Acc:HGNC:4901]
28	12273743	12439636	569	165894	ENSCAFT00000015003,ENSCAFT00000015047	CNNM1,GOT1	cyclin and CBS domain divalent metal cation transport mediator 1 [Source:HGNC Symbol;Acc:HGNC:102],glutamic-oxaloacetic transaminase 1, soluble [Source:HGNC Symbol;Acc:HGNC:4432]
28	16230815	16313217	300	82403	ENSCAFT00000016654,ENSCAFT00000046042,ENSCAFT00000016672,ENSCAFT00000045427,ENSCAFT00000016744	OBFC1,OBFC1,PSMA1,RP11-140L24.4,SLK,SLK	oligonucleotide/oligosaccharide-binding fold containing 1 [Source:HGNC Symbol;Acc:HGNC:26200],oligonucleotide/oligosaccharide-binding fold containing 1 [Source:HGNC Symbol;Acc:HGNC:26200],proteasome (prosome, macropain) subunit, alpha type, 1 [Source:HGNC Symbol;Acc:HGNC:9530],Proteasome subunit alpha type [Source:UniProtKB/TrEMBL;Acc:B4DEV8],STE20-like kinase [Source:HGNC Symbol;Acc:HGNC:11088],…
28	17223257	17241921	176	18665	ENSCAFT00000048390,ENSCAFT00000016888	SORCS3,SORCS3	sortilin-related VPS10 domain containing receptor 3 [Source:HGNC Symbol;Acc:HGNC:16699],sortilin-related VPS10 domain containing receptor 3 [Source:HGNC Symbol;Acc:HGNC:16699]
28	17460458	17460515	5	58	ENSCAFT00000048390,ENSCAFT00000016888	SORCS3,SORCS3	sortilin-related VPS10 domain containing receptor 3 [Source:HGNC Symbol;Acc:HGNC:16699],sortilin-related VPS10 domain containing receptor 3 [Source:HGNC Symbol;Acc:HGNC:16699]
28	17787773	17787827	5	55
28	18017678	18018030	11	353
28	18179322	18185145	34	5824
28	18186294	18186334	3	41
28	19170309	19264035	615	93727
28	20122560	20427660	1117	305101
28	20435429	20596140	583	160712
28	20839790	21043536	871	203747
28	22597515	22633861	157	36347	ENSCAFT00000017248	RPL27	ribosomal protein L27 [Source:HGNC Symbol;Acc:HGNC:10328]
28	22836523	22849040	65	12518
28	22852015	22853330	18	1316
29	752828	1191801	1158	438974	ENSCAFT00000047699,ENSCAFT00000048128,ENSCAFT00000010686,ENSCAFT00000010700	N/A,N/A,EFCAB1,SNAI2	N/A,N/A,EF-hand calcium binding domain 1 [Source:HGNC Symbol;Acc:HGNC:25678],snail family zinc finger 2 [Source:HGNC Symbol;Acc:HGNC:11094]
29	2814895	2815033	3	139	ENSCAFT00000010804	SNTG1	syntrophin, gamma 1 [Source:HGNC Symbol;Acc:HGNC:13740]
29	2841530	2861967	149	20438
29	4776301	4776301	1	1
29	5981543	6100107	391	118565	ENSCAFT00000042954	SOX17	SRY (sex determining region Y)-box 17 [Source:HGNC Symbol;Acc:HGNC:18122]
29	6827823	6924851	235	97029	ENSCAFT00000011208	XKR4	XK, Kell blood group complex subunit-related family, member 4 [Source:HGNC Symbol;Acc:HGNC:29394]
29	7811788	7813689	25	1902
29	8576441	8639351	350	62911	ENSCAFT00000001715	N/A	N/A
29	9136676	9137822	7	1147
29	12196450	12196450	1	1
29	12693400	12882226	762	188827
29	17339519	17339709	14	191
30	12180467	12197492	114	17026
30	12801029	12801136	5	108
30	12980720	12981328	5	609
30	13401244	13510761	525	109518	ENSCAFT00000021946	N/A	N/A
30	14122571	14122629	8	59
30	27781960	27974803	746	192844	ENSCAFT00000026890,ENSCAFT00000048567,ENSCAFT00000047454,ENSCAFT00000026901,ENSCAFT00000026900	RAB8B,RAB8B,APH1B,CA12,CA12	RAB8B, member RAS oncogene family [Source:HGNC Symbol;Acc:HGNC:30273],RAB8B, member RAS oncogene family [Source:HGNC Symbol;Acc:HGNC:30273],APH1B gamma secretase subunit [Source:HGNC Symbol;Acc:HGNC:24080],carbonic anhydrase XII [Source:HGNC Symbol;Acc:HGNC:1371],carbonic anhydrase XII [Source:HGNC Symbol;Acc:HGNC:1371]
30	29950512	30149606	956	199095	ENSCAFT00000044304,ENSCAFT00000027313,ENSCAFT00000027314,ENSCAFT00000046155,ENSCAFT00000027320,ENSCAFT00000050200	VWA9,VWA9,SLC24A1,DENND4A,DENND4A,DENND4A	von Willebrand factor A domain containing 9 [Source:HGNC Symbol;Acc:HGNC:25372],von Willebrand factor A domain containing 9 [Source:HGNC Symbol;Acc:HGNC:25372],solute carrier family 24 (sodium/potassium/calcium exchanger), member 1 [Source:HGNC Symbol;Acc:HGNC:10975],DENN/MADD domain containing 4A [Source:HGNC Symbol;Acc:HGNC:24321],DENN/MADD domain containing 4A [Source:HGNC Symbol;Acc:HGNC:2432…
30	30149689	30604756	2143	455068	ENSCAFT00000027321,ENSCAFT00000027349,ENSCAFT00000027347	RAB11A,MEGF11,MEGF11	RAB11A, member RAS oncogene family [Source:HGNC Symbol;Acc:HGNC:9760],multiple EGF-like-domains 11 [Source:HGNC Symbol;Acc:HGNC:29635],multiple EGF-like-domains 11 [Source:HGNC Symbol;Acc:HGNC:29635]
30	34544529	34544660	8	132
30	35945775	35945783	2	9	ENSCAFT00000046614,ENSCAFT00000028094	ARIH1,ARIH1	ariadne RBR E3 ubiquitin protein ligase 1 [Source:HGNC Symbol;Acc:HGNC:689],ariadne RBR E3 ubiquitin protein ligase 1 [Source:HGNC Symbol;Acc:HGNC:689]
30	38795657	38795679	3	23
31	1251864	1525399	959	273536
31	2153217	2153439	13	223	ENSCAFT00000012473	CADM2	cell adhesion molecule 2 [Source:HGNC Symbol;Acc:HGNC:29849]
31	2643842	2643987	10	146
31	4506610	4506722	6	113
31	4528721	4528794	3	74
31	5939784	5939826	5	43	ENSCAFT00000012537	GBE1	glucan (1,4-alpha-), branching enzyme 1 [Source:HGNC Symbol;Acc:HGNC:4180]
31	6051327	6051518	4	192
31	6541577	6560727	95	19151
31	6982111	7073247	493	91137
31	8092284	8092385	13	102	ENSCAFT00000012668	ROBO1	roundabout guidance receptor 1 [Source:HGNC Symbol;Acc:HGNC:10249]
31	8975994	8975994	1	1
31	10631819	10631819	1	1
31	11103124	11103234	3	111
31	11402944	11422196	85	19253
31	12135696	12135791	5	96
31	12819685	12819889	8	205
31	15341062	15341068	2	7
31	18146508	18148103	21	1596
34	1276668	1618682	1171	342015
34	3044570	3178260	423	133691	ENSCAFT00000043483,ENSCAFT00000015867	CTNND2,CTNND2	catenin (cadherin-associated protein), delta 2 [Source:HGNC Symbol;Acc:HGNC:2516],catenin (cadherin-associated protein), delta 2 [Source:HGNC Symbol;Acc:HGNC:2516]
34	5114755	5115160	10	406
34	5560569	5575757	126	15189
34	7104100	7695650	1797	591551	ENSCAFT00000037777,ENSCAFT00000016429,ENSCAFT00000047434,ENSCAFT00000016442,ENSCAFT00000042476,ENSCAFT00000041176	SRD5A1,NSUN2,UBE2QL1,MED10,RNU6-853P,N/A	steroid-5-alpha-reductase, alpha polypeptide 1 (3-oxo-5 alpha-steroid delta 4-dehydrogenase alpha 1) [Source:HGNC Symbol;Acc:HGNC:11284],NOP2/Sun RNA methyltransferase family, member 2 [Source:HGNC Symbol;Acc:HGNC:25994],ubiquitin-conjugating enzyme E2Q family-like 1 [Source:HGNC Symbol;Acc:HGNC:37269],mediator complex subunit 10 [Source:HGNC Symbol;Acc:HGNC:28760],RNA, U6 small nuclear 853, pseu…
34	8373959	8375548	16	1590
34	9668027	9668074	4	48
34	9928132	9950792	129	22661
34	10161628	10161728	8	101
34	25223625	25242440	111	18816
34	25444662	25447795	54	3134	ENSCAFT00000047003,ENSCAFT00000022510	IQCJ,IQCJ	IQ motif containing J [Source:HGNC Symbol;Acc:HGNC:32406],IQ motif containing J [Source:HGNC Symbol;Acc:HGNC:32406]
34	26411148	26411209	4	62	ENSCAFT00000047620,ENSCAFT00000022596	IFT80,IFT80	intraflagellar transport 80 [Source:HGNC Symbol;Acc:HGNC:29262],intraflagellar transport 80 [Source:HGNC Symbol;Acc:HGNC:29262]
34	26412228	26413018	17	791	ENSCAFT00000047620,ENSCAFT00000022596	IFT80,IFT80	intraflagellar transport 80 [Source:HGNC Symbol;Acc:HGNC:29262],intraflagellar transport 80 [Source:HGNC Symbol;Acc:HGNC:29262]
34	29014704	29014723	3	20
34	29321868	29321916	6	49
35	1438247	1438278	6	32
35	3341359	3341588	17	230
35	3356288	3356288	1	1
35	3564999	3565002	2	4	ENSCAFT00000014877	SLC22A23	solute carrier family 22, member 23 [Source:HGNC Symbol;Acc:HGNC:21106]
35	4166733	4212794	255	46062
35	4674325	4723526	215	49202
36	9424297	9424317	2	21
37	1813130	1966846	532	153717	ENSCAFT00000044081,ENSCAFT00000016040	MYO1B,MYO1B	myosin IB [Source:HGNC Symbol;Acc:HGNC:7596],myosin IB [Source:HGNC Symbol;Acc:HGNC:7596]
37	3796339	3796367	7	29
37	4253905	4720634	1109	466730
37	5709312	5709312	1	1
37	5971334	5971334	1	1
37	6257581	6408736	518	151156	ENSCAFT00000017050,ENSCAFT00000047787,ENSCAFT00000040196,ENSCAFT00000043131,ENSCAFT00000043408,ENSCAFT00000017063	CCDC150,CCDC150,SNORD56,SNORD56,SNORD56,SNORD56,SNORD56,SNORD56B,SNORD56,N/A,GTF3C3,GTF3C3	coiled-coil domain containing 150 [Source:HGNC Symbol;Acc:HGNC:26834],coiled-coil domain containing 150 [Source:HGNC Symbol;Acc:HGNC:26834],Small nucleolar RNA SNORD56 [Source:RFAM;Acc:RF00275],Small nucleolar RNA SNORD56 [Source:RFAM;Acc:RF00275],Small nucleolar RNA SNORD56 [Source:RFAM;Acc:RF00275],Small nucleolar RNA SNORD56 [Source:RFAM;Acc:RF00275],Small nucleolar RNA SNORD56 [Source:RFAM;Ac…
37	7333591	8076922	2095	743332	ENSCAFT00000040951,ENSCAFT00000017444	N/A,PLCL1	N/A,phospholipase C-like 1 [Source:HGNC Symbol;Acc:HGNC:9063]
37	8467733	12670031	10773	4202299	ENSCAFT00000046713,ENSCAFT00000017482,ENSCAFT00000017485,ENSCAFT00000017489,ENSCAFT00000044447,ENSCAFT00000017495,ENSCAFT00000042188,ENSCAFT00000017567,ENSCAFT00000017593,ENSCAFT00000046092,ENSCAFT00000044472,ENSCAFT00000017602,ENSCAFT00000049996,ENSCAFT00000018640,ENSCAFT00000018742,ENSCAFT00000018786,ENSCAFT00000018895,ENSCAFT00000018904,ENSCAFT00000018961,ENSCAFT00000043986,ENSCAFT00000019068,…	SATB2,SATB2,C2ORF69,TYW5,C2ORF47,C2ORF47,RNU6-235P,SPATS2L,KCTD18,SGOL2,SGOL2,SGOL2,N/A,AOX1,AOX1,AOX1,BZW1,C14ORF119,CLK1,PPIL3,NIF3L1,ORC2,FAM126B,RNU6-73P,NDUFB3,CFLAR,CFLAR,CASP10,CASP10,N/A,CASP8,ALS2CR12,TRAK2,TRAK2,RNU6-903P,RNU6-205P,RNU6-193P,RNU6-1050P,RNU6-1114P,RNU6-518P,RNU6-120P,N/A,STRADB,STRADB,ALS2CR11,ALS2CR11,TMEM237,TMEM237,TMEM237,MPP4,ALS2,N/A,CDK15,FZD7,N/A,N/A,SUMO1,NOP58,…	SATB homeobox 2 [Source:HGNC Symbol;Acc:HGNC:21637],SATB homeobox 2 [Source:HGNC Symbol;Acc:HGNC:21637],chromosome 2 open reading frame 69 [Source:HGNC Symbol;Acc:HGNC:26799],tRNA-yW synthesizing protein 5 [Source:HGNC Symbol;Acc:HGNC:26754],chromosome 2 open reading frame 47 [Source:HGNC Symbol;Acc:HGNC:26198],chromosome 2 open reading frame 47 [Source:HGNC Symbol;Acc:HGNC:26198],RNA, U6 small n…
37	12848101	12848106	3	6
37	13325823	14613123	5079	1287301	ENSCAFT00000020468,ENSCAFT00000043157,ENSCAFT00000035100,ENSCAFT00000020490,ENSCAFT00000044401,ENSCAFT00000021053,ENSCAFT00000021130	PARD3B,PARD3B,N/A,RPSA,SNORA62,NRP2,INO80D	par-3 family cell polarity regulator beta [Source:HGNC Symbol;Acc:HGNC:14446],par-3 family cell polarity regulator beta [Source:HGNC Symbol;Acc:HGNC:14446],N/A,ribosomal protein SA [Source:HGNC Symbol;Acc:HGNC:6502],Small nucleolar RNA SNORA62/SNORA6 family [Source:RFAM;Acc:RF00091],neuropilin 2 [Source:HGNC Symbol;Acc:HGNC:8005],INO80 complex subunit D [Source:HGNC Symbol;Acc:HGNC:25997]
37	15203263	16710061	4902	1506799	ENSCAFT00000046201,ENSCAFT00000038162,ENSCAFT00000038159,ENSCAFT00000038155,ENSCAFT00000021318,ENSCAFT00000021343,ENSCAFT00000021360,ENSCAFT00000021387,ENSCAFT00000021390,ENSCAFT00000042663,ENSCAFT00000041259,ENSCAFT00000047202,ENSCAFT00000042739,ENSCAFT00000021442,ENSCAFT00000021444,ENSCAFT00000048151,ENSCAFT00000021474,ENSCAFT00000021473,ENSCAFT00000021490,ENSCAFT00000047776,ENSCAFT00000021506,…	DYTN,DYTN,MDH1B,MDH1B,MDH1B,FASTKD2,CPO,KLF7,KLF7,N/A,N/A,N/A,METTL21A,CREB1,CREB1,CREB1,CCNYL1,CCNYL1,FZD5,N/A,PLEKHM3,N/A,N/A,CRYGD,CRYGC,RNU6-234P,RNU6-75P,RNU6-1288P,CRYGB,CRYGA,C2ORF80,C2ORF80,IDH1,PIKFYVE,PTH2R,PTH2R	dystrotelin [Source:HGNC Symbol;Acc:HGNC:23279],dystrotelin [Source:HGNC Symbol;Acc:HGNC:23279],malate dehydrogenase 1B, NAD (soluble) [Source:HGNC Symbol;Acc:HGNC:17836],malate dehydrogenase 1B, NAD (soluble) [Source:HGNC Symbol;Acc:HGNC:17836],malate dehydrogenase 1B, NAD (soluble) [Source:HGNC Symbol;Acc:HGNC:17836],FAST kinase domains 2 [Source:HGNC Symbol;Acc:HGNC:29160],carboxypeptidase O […
37	16920543	17598863	3323	678321	ENSCAFT00000021737,ENSCAFT00000048086,ENSCAFT00000042948,ENSCAFT00000021799,ENSCAFT00000021797	N/A,N/A,N/A,MAP2,MAP2	N/A,N/A,N/A,microtubule-associated protein 2 [Source:HGNC Symbol;Acc:HGNC:6839],microtubule-associated protein 2 [Source:HGNC Symbol;Acc:HGNC:6839]
37	18099421	18101574	78	2154
37	18749766	18876547	651	126782
37	19577110	19708340	615	131231	ENSCAFT00000022535	ERBB4	erb-b2 receptor tyrosine kinase 4 [Source:HGNC Symbol;Acc:HGNC:3432]
37	19975649	19975716	7	68
37	20181111	20392736	521	211626
37	20872450	20872952	21	503	ENSCAFT00000022651,ENSCAFT00000046650	N/A,N/A	N/A,N/A
37	21413632	21413668	3	37
37	21801029	21906181	452	105153	ENSCAFT00000048914	VWC2L	von Willebrand factor C domain containing protein 2-like [Source:HGNC Symbol;Acc:HGNC:37203]
37	22365997	22366087	14	91
37	22614615	22617246	52	2632
37	23206068	23247278	251	41211	ENSCAFT00000022889	MARCH4	membrane-associated ring finger (C3HC4) 4, E3 ubiquitin protein ligase [Source:HGNC Symbol;Acc:HGNC:29269]
37	23490155	23490199	8	45
37	23950584	23950874	24	291
37	27453840	27454094	28	255
37	28378585	28453235	243	74651	ENSCAFT00000025445	PAX3	paired box 3 [Source:HGNC Symbol;Acc:HGNC:8617]
37	29584417	29585799	42	1383	ENSCAFT00000025694	AP1S3	adaptor-related protein complex 1, sigma 3 subunit [Source:HGNC Symbol;Acc:HGNC:18971]
37	30124553	30902202	2855	777650	ENSCAFT00000025761,ENSCAFT00000025847,ENSCAFT00000025892,ENSCAFT00000025898	ERICH1,DLGAP2,N/A,CLN8	glutamate-rich 1 [Source:HGNC Symbol;Acc:HGNC:27234],discs, large (Drosophila) homolog-associated protein 2 [Source:HGNC Symbol;Acc:HGNC:2906],N/A,ceroid-lipofuscinosis, neuronal 8 [Source:HGNC Symbol;Acc:HGNC:2079]
38	1077582	1079735	23	2154	ENSCAFT00000015363	MDM4	MDM4, p53 regulator [Source:HGNC Symbol;Acc:HGNC:6974]
38	2150800	2598630	1654	447831	ENSCAFT00000016150,ENSCAFT00000049880,ENSCAFT00000016170,ENSCAFT00000016167,ENSCAFT00000016137,ENSCAFT00000016179,ENSCAFT00000016185,ENSCAFT00000016203,ENSCAFT00000048475,ENSCAFT00000016207,ENSCAFT00000049727,ENSCAFT00000016232	NUCKS1,N/A,RAB29,SLC41A1,PM20D1,SLC26A9,RAB7B,CTSE,C1ORF186,AVPR1B,FAM72A,FAM72D,FAM72C,FAM72B,SRGAP2C,SRGAP2,SRGAP2B	nuclear casein kinase and cyclin-dependent kinase substrate 1 [Source:HGNC Symbol;Acc:HGNC:29923],N/A,RAB29, member RAS oncogene family [Source:HGNC Symbol;Acc:HGNC:9789],solute carrier family 41 (magnesium transporter), member 1 [Source:HGNC Symbol;Acc:HGNC:19429],peptidase M20 domain containing 1 [Source:HGNC Symbol;Acc:HGNC:26518],solute carrier family 26 (anion exchanger), member 9 [Source:HG…
38	2928713	3431424	1245	502712	ENSCAFT00000046957,ENSCAFT00000016379,ENSCAFT00000016373,ENSCAFT00000042207,ENSCAFT00000048673	CFH,CFH,CFH,N/A,KCNT2	complement factor H [Source:HGNC Symbol;Acc:HGNC:4883],complement factor H [Source:HGNC Symbol;Acc:HGNC:4883],complement factor H [Source:HGNC Symbol;Acc:HGNC:4883],N/A,potassium channel, sodium activated subfamily T, member 2 [Source:HGNC Symbol;Acc:HGNC:18866]
38	5234034	5384265	657	150232
38	5896969	5896983	2	15	ENSCAFT00000016748	CDC73	cell division cycle 73 [Source:HGNC Symbol;Acc:HGNC:16783]
38	5900251	5900251	1	1	ENSCAFT00000016748	CDC73	cell division cycle 73 [Source:HGNC Symbol;Acc:HGNC:16783]
38	7078762	7080017	7	1256
38	7822490	7884057	371	61568
38	7946454	7946454	1	1
38	9067905	9067905	1	1
38	11175453	11175479	4	27	ENSCAFT00000017072	USH2A	Usher syndrome 2A (autosomal recessive, mild) [Source:HGNC Symbol;Acc:HGNC:12601]
38	11955303	11955353	10	51	ENSCAFT00000046515,ENSCAFT00000017132	ESRRG,ESRRG	estrogen-related receptor gamma [Source:HGNC Symbol;Acc:HGNC:3474],estrogen-related receptor gamma [Source:HGNC Symbol;Acc:HGNC:3474]
38	13200915	13200924	4	10
38	13563222	13563232	4	11
38	14147522	14148000	30	479
38	14771032	14929408	701	158377	ENSCAFT00000017310,ENSCAFT00000048839,ENSCAFT00000017379,ENSCAFT00000017536,ENSCAFT00000039913,ENSCAFT00000032678,ENSCAFT00000017715	EPRS,BPNT1,BPNT1,IARS2,MIR215,MIR194-1,RAB3GAP2	glutamyl-prolyl-tRNA synthetase [Source:HGNC Symbol;Acc:HGNC:3418],3'(2'), 5'-bisphosphate nucleotidase 1 [Source:HGNC Symbol;Acc:HGNC:1096],3'(2'), 5'-bisphosphate nucleotidase 1 [Source:HGNC Symbol;Acc:HGNC:1096],isoleucyl-tRNA synthetase 2, mitochondrial [Source:HGNC Symbol;Acc:HGNC:29685],microRNA 215 [Source:HGNC Symbol;Acc:HGNC:31592],microRNA 194-1 [Source:HGNC Symbol;Acc:HGNC:31564],RAB3 …
38	15211469	15325837	344	114369	ENSCAFT00000017746,ENSCAFT00000017983,ENSCAFT00000043806	N/A,MARK1,MARK1	N/A,MAP/microtubule affinity-regulating kinase 1 [Source:HGNC Symbol;Acc:HGNC:6896],MAP/microtubule affinity-regulating kinase 1 [Source:HGNC Symbol;Acc:HGNC:6896]
38	16180101	16180139	4	39
38	16561622	16562079	15	458
38	16909642	16909711	14	70	ENSCAFT00000021557,ENSCAFT00000021570	MIA3,MIA3	melanoma inhibitory activity family, member 3 [Source:HGNC Symbol;Acc:HGNC:24008],melanoma inhibitory activity family, member 3 [Source:HGNC Symbol;Acc:HGNC:24008]
